# Supplementary material for: Use of the Visceral Adiposity Index as an Indicator of Chronic Kidney Disease in Older Adults: Comparison with Body Mass Index
Source: MDPI journal article supplement (doi:10.3390/jcm11216297), 2022-10-26
Supplement: s1 [file s1]

**Table S1.** Characteristics of study subjects and differences between males and females

|                             | Overall<br>(n = 7736) | Male<br>(n = 3479) | Female<br>(n = 4257) | <i>P</i> Value |
|-----------------------------|-----------------------|--------------------|----------------------|----------------|
| Glucose, mg/dL              | 107.5 ± 26.0          | 107.6 ± 26.2       | 107.3 ± 25.8         | = 0.611        |
| Total cholesterol, mg/dL    | 187.0 ± 39.5          | 185.7 ± 39.6       | 188.0 ± 39.3         | < 0.05         |
| Handgrip strength, kg       | 24.6 ± 8.6            | 24.6 ± 8.7         | 24.5 ± 8.6           | = 0.658        |
| Total energy intake, kcal/d | 1729.4 ± 729.2        | 1735.4 ± 735.8     | 1724.4 ± 723.9       | = 0.509        |
| Carbohydrate intake, g      | 293.5 ± 120.2         | 295.2 ± 120.7      | 292.2 ± 119.8        | = 0.274        |
| Protein intake, g           | 58.3 ± 30.3           | 58.3 ± 30.8        | 58.3 ± 29.9          | = 0.945        |
| Fat intake, g               | 29.3 ± 22.7           | 29.0 ± 23.1        | 29.5 ± 22.4          | = 0.359        |
| Medication (%)              |                       |                    |                      |                |
| Dyslipidemia                | 1999 (25.8)           | 663 (8.6)          | 1336 (17.3)          | < 0.001        |
| Diabetes                    | 1474 (19.1)           | 705 (9.1)          | 769 (9.9)            | < 0.05         |
| Hypertension                | 3741 (48.4)           | 1631 (21.1)        | 2110 (27.3)          | < 0.05         |
| Household income (%)        |                       |                    |                      | < 0.001        |
| Low                         | 2922 (37.8)           | 1124 (32.3)        | 1798 (42.2)          |                |
| Lower-middle                | 2244 (29.0)           | 1068 (30.7)        | 1176 (27.6)          |                |
| Upper middle                | 1455 (18.8)           | 696 (20.0)         | 759 (17.8)           |                |
| High                        | 1115 (14.4)           | 591 (17.0)         | 524 (12.3)           |                |
| Education level (%)         |                       |                    |                      | < 0.001        |
| Primary school              | 3849 (49.8)           | 1216 (35.0)        | 2633 (61.9)          |                |
| Middle school               | 1330 (17.2)           | 639 (18.4)         | 691 (16.2)           |                |
| High school                 | 1578 (20.4)           | 945 (27.2)         | 633 (14.9)           |                |
| College                     | 979 (12.7)            | 679 (19.5)         | 300 (7.0)            |                |
| Alcohol consumption (%)     |                       |                    |                      | = 0.104        |
| Never                       | 3385 (43.8)           | 1491 (42.9)        | 1894 (44.5)          |                |
| ≤ once a week               | 2911 (37.6)           | 1299 (37.3)        | 1612 (37.9)          |                |
| 2-3 times/week              | 809 (10.5)            | 385 (11.1)         | 424 (10.0)           |                |
| ≥ 4 times/week              | 631 (8.2)             | 304 (8.7)          | 327 (7.7)            |                |
| Smoking (%)                 |                       |                    |                      | < 0.01         |
| Never                       | 4717 (61.0)           | 2046 (58.8)        | 2671 (62.7)          |                |
| Former smoking              | 2207 (28.5)           | 1044 (30.0)        | 1163 (27.3)          |                |
| Current smoking             | 812 (10.5)            | 389 (11.2)         | 423 (9.9)            |                |

Values are means ± SD. The independent t-test or Mann–Whitney U test were used to compare the males and females.

**Table S2.** Sex-specific differences and trends of subjects by eGFR category

|                                 | eGFR category (mL/min/1.73 m <sup>2</sup> ) |                                    |                                    | <i>P</i> for difference | <i>SS</i> <sup>‡</sup> | <i>P</i> for trend <sup>‡</sup> |
|---------------------------------|---------------------------------------------|------------------------------------|------------------------------------|-------------------------|------------------------|---------------------------------|
|                                 | A                                           | B                                  | C                                  |                         |                        |                                 |
| Male, n                         | 1752                                        | 1185                               | 320                                |                         |                        |                                 |
| Glucose, mg/dL                  | 100.0 ± 22.0<br>(98.9, 101.0)               | 102.6 ± 22.9<br>(101.3, 103.9)     | 104.7 ± 25.9<br>(101.9, 107.5)     | A < B, C                | 7.72                   | < 0.001                         |
| Cholesterol, mg/dL              | 191.2 ± 36.5<br>(190.4, 193.8)              | 195.2 ± 38.1<br>(193.0, 197.3)     | 191.7 ± 38.5<br>(187.5, 196.0)     | NS                      | 1.82                   | = 0.069                         |
| Handgrip, kg                    | 28.2 ± 9.7<br>(27.8, 28.7)                  | 28.9 ± 9.9<br>(28.3, 29.4)         | 27.7 ± 9.6<br>(26.7, 28.8)         | NS                      | 0.81                   | = 0.416                         |
| TEI, kcal/d <sup>†</sup>        | 2038.8 ± 914.1<br>(1984.3, 2070.6)          | 1972.1 ± 828.2<br>(1916.9, 2010.7) | 1745.2 ± 818.6<br>(1704.5, 1873.8) | A, B > C                | -3.84                  | < 0.05                          |
| Carbo, g                        | 308.5 ± 135.5<br>(302.2, 314.9)             | 315.2 ± 127.6<br>(308.0, 322.5)    | 298.7 ± 115.2<br>(286.0, 311.3)    | NS                      | 0.80                   | = 0.427                         |
| Protein, g <sup>†</sup>         | 72.7 ± 42.2<br>(70.7, 74.6)                 | 68.5 ± 37.4<br>(66.3, 70.6)        | 60.4 ± 34.9<br>(56.6, 64.3)        | A > B > C               | -5.35                  | < 0.001                         |
| Fat, g <sup>†</sup>             | 44.4 ± 34.7<br>(42.8, 46.0)                 | 39.1 ± 30.3<br>(37.3, 40.8)        | 33.8 ± 31.1<br>(30.4, 37.2)        | A > B > C               | -7.38                  | < 0.001                         |
| Female, n                       | 2048                                        | 1410                               | 338                                |                         |                        |                                 |
| Glucose, mg/dL                  | 101.0 ± 24.7<br>(100.0, 102.1)              | 103.9 ± 24.9<br>(102.6, 105.2)     | 103.6 ± 25.0<br>(100.9, 106.3)     | A < B                   | 6.46                   | < 0.001                         |
| Cholesterol, mg/dL <sup>†</sup> | 191.9 ± 35.5<br>(190.4, 193.4)              | 192.8 ± 39.0<br>(190.7, 194.8)     | 192.9 ± 42.0<br>(188.4, 197.4)     | NS                      | 0.43                   | = 0.669                         |
| Handgrip, kg                    | 28.6 ± 9.5<br>(28.2, 29.9)                  | 27.8 ± 10.0<br>(27.3, 28.3)        | 27.1 ± 9.5<br>(26.1, 28.1)         | NS                      | -1.27                  | = 0.205                         |
| TEI, kcal/d <sup>†</sup>        | 2012.2 ± 901.5<br>(1973.1, 2051.3)          | 1901.8 ± 833.3<br>(1858.3, 1945.4) | 1815.0 ± 768.0<br>(1732.8, 1897.2) | A > B, C                | -1.81                  | = 0.071                         |
| Carbo, g                        | 307.2 ± 132.6<br>(301.5, 312.9)             | 309.6 ± 131.0<br>(302.8, 316.4)    | 303.8 ± 119.6<br>(291.0, 316.6)    | NS                      | -0.44                  | = 0.662                         |
| Protein, g <sup>†</sup>         | 70.9 ± 37.6<br>(69.3, 72.5)                 | 64.8 ± 34.6<br>(63.0, 66.6)        | 61.6 ± 36.0<br>(57.8, 65.5)        | A > B > C               | -6.12                  | < 0.001                         |
| Fat, g <sup>†</sup>             | 43.8 ± 33.3<br>(42.4, 45.2)                 | 36.5 ± 28.0<br>(35.0, 38.0)        | 32.0 ± 24.7<br>(29.4, 34.7)        | A > B > C               | -8.88                  | < 0.001                         |

Values are means ± SD (95% CI). <sup>†</sup>Mann-Whitney U test was applied to assess the difference between groups. <sup>‡</sup>Jonckheere-Terpstra test was used to assess the trend among three groups. A = eGFR ≥ 60 (95% CI); B = eGFR 45-59.9 (95% CI); C = eGFR < 45 (95% CI); Carbo = Carbohydrate TEI = Total energy intake; SS = standardized statistic; NS = not significant
